# Supplementary material for: Cu(ii)-Based binuclear compound for the application of photosensitive electronic devices
Source: Royal Society of Chemistry journal article supplement (doi:10.1039/c8nj00313k), 2018-01-01
Supplement: c8nj00313k1.pdf [file c8nj00313k1.pdf]

## Electronic Supplementary Information

### **Cu(II)-based binuclear compound for the application of photosensitive electronic device**

Basudeb Dutta,<sup>a</sup> Arka Dey,<sup>b</sup> Kaushik Naskar,<sup>c</sup> Faruk Ahmed,<sup>a</sup> Rakesh Purkait,<sup>c</sup> Sakhiul Islam,<sup>a</sup> Soumen Ghosh,<sup>d</sup> Chittaranjan Sinha,<sup>c</sup> Partha Pratim Ray,<sup>\*b</sup> and Mohammad Hedayetullah Mir<sup>\*a</sup>

<sup>a</sup>Department of Chemistry, Aliah University, New Town, Kolkata 700 156, India. Email: [chmmir@gmail.com](mailto:chmmir@gmail.com)

<sup>b</sup>Department of Physics, Jadavpur University, Jadavpur, Kolkata 700 032, India. Email: [partha@phys.jdvu.ac.in](mailto:partha@phys.jdvu.ac.in)

<sup>c</sup>Department of Chemistry, Jadavpur University, Jadavpur, Kolkata 700 032, India.

<sup>d</sup>Department of Chemistry, University of Calcutta, 92 A.P.C. Road, Kolkata 700 009, India

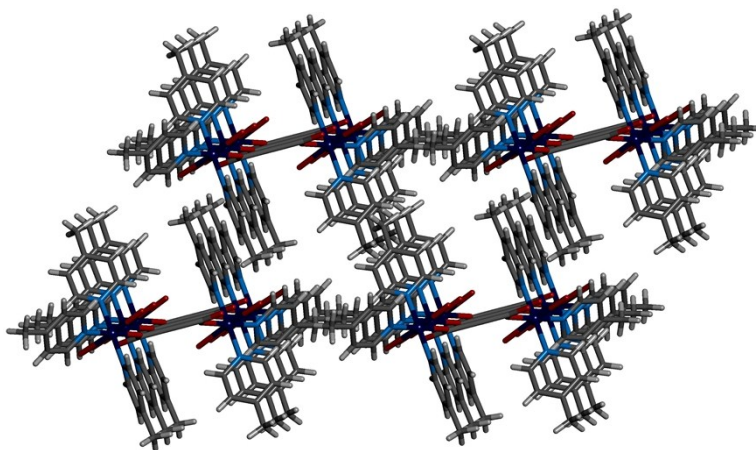

**Fig. S1** A view of 3D supramolecular aggregate in compound **1** via hydrogen bonding and C-H... $\pi$  interactions.

**Table S1** Crystal data and refinement parameters for compound **1**

|                                                                             |                                                                                                             |
|-----------------------------------------------------------------------------|-------------------------------------------------------------------------------------------------------------|
| Formula                                                                     | C <sub>40</sub> H <sub>42</sub> Cl <sub>2</sub> Cu <sub>2</sub> N <sub>6</sub> O <sub>16</sub> ( <b>1</b> ) |
| fw                                                                          | 1060.77                                                                                                     |
| cryst syst                                                                  | triclinic                                                                                                   |
| space group                                                                 | <i>P</i> $\bar{1}$                                                                                          |
| <i>a</i> (Å)                                                                | 8.3736(8)                                                                                                   |
| <i>b</i> (Å)                                                                | 10.9069(9)                                                                                                  |
| <i>c</i> (Å)                                                                | 14.1280(14)                                                                                                 |
| $\alpha$ (deg)                                                              | 101.860(4)                                                                                                  |
| $\beta$ (deg)                                                               | 96.035(5)                                                                                                   |
| $\gamma$ (deg)                                                              | 105.536(4)                                                                                                  |
| <i>V</i> (Å <sup>3</sup> )                                                  | 1198.94(19)                                                                                                 |
| <i>Z</i>                                                                    | 1                                                                                                           |
| <i>D</i> <sub>calcd</sub> (g/cm <sup>3</sup> )                              | 1.469                                                                                                       |
| $\mu$ (mm <sup>-1</sup> )                                                   | 1.071                                                                                                       |
| $\lambda$ (Å)                                                               | 0.71073                                                                                                     |
| data [ <i>I</i> > 2 $\sigma$ ( <i>I</i> )]/params                           | 5960/299                                                                                                    |
| GOF on <i>F</i> <sup>2</sup>                                                | 1.059                                                                                                       |
| final <i>R</i> indices [ <i>I</i> > 2 $\sigma$ ( <i>I</i> )] <sup>a,b</sup> | <i>R</i> 1 = 0.0523<br><i>wR</i> 2 = 0.1580                                                                 |

<sup>a</sup>  $R1 = \sum ||F_o| - |F_c|| / \sum |F_o|$ , <sup>b</sup>  $wR2 = [\sum w(F_o^2 - F_c^2)^2 / \sum w(F_o^2)^2]^{1/2}$

**Table S2** Selected bond lengths and bond angles in **1**

|                  |            |                   |            |
|------------------|------------|-------------------|------------|
| Cu(1)-O(1)       | 2.006(2)   | Cu(1)-O(2W)       | 2.587(3)   |
| Cu(1)-N(2)       | 2.033(2)   | Cu(1)-N(1)        | 2.008(2)   |
| Cu(1)-O(1W)      | 2.384(2)   | Cu(1)-N(3)        | 2.012(2)   |
| O(1)-Cu(1)-N(3)  | 89.47(9)   | N(2)-Cu(1)-N(3)   | 91.72(9)   |
| O(1)-Cu(1)-O(1W) | 86.16(8)   | O(1W)-Cu(1)-N(2)  | 94.06(9)   |
| O(1)-Cu(1)-N(2)  | 178.79(8)  | O(2W)-Cu(1)-N(2)  | 88.38(9)   |
| O(1W)-Cu(1)-N(1) | 91.01(8)   | N(1)-Cu(1)-N(3)   | 177.65(10) |
| O(2W)-Cu(1)-N(1) | 93.63(9)   | O(1)-Cu(1)-N(1)   | 88.56(9)   |
| N(1)-Cu(1)-N(2)  | 90.25(9)   | O(1W)-Cu(1)-O(2W) | 174.75(9)  |
| Cu(1)-O(1)-C(19) | 128.68(18) | O(1W)-Cu(1)-N(3)  | 90.14(8)   |
| O(1)-Cu(1)-O(2W) | 91.50(8)   | O(2W)-Cu(1)-N(3)  | 85.14(9)   |

**Table S3** Intermolecular hydrogen bonding interactions in **1**

|                   | D···A        | D···A (Å) |
|-------------------|--------------|-----------|
| <b>Compound 1</b> | O(1W)···O(1) | 2.850     |

It is important to mention that the hydrogen atoms of water molecule in compound **1** could not be added even after several trials. The O-H bond may be too large and could not be refined.

**Table S4** C-H··· $\pi$  interactions in **1**.

|                   | C-H→ ring(j)     | H···R<br>distance (Å) | C-H···R<br>angle(deg) | C···R<br>distance (Å) |
|-------------------|------------------|-----------------------|-----------------------|-----------------------|
| <b>Compound 1</b> | C(6)-H(6)→R(1)   | 3.088                 | 160.39                | 4.005                 |
|                   | C(12)-H(12)→R(2) | 3.257                 | 157.70                | 4.161                 |
|                   | C(18)-H(18)→R(3) | 2.968                 | 157.11                | 3.871                 |

R(j) denotes the j-th ring: R(1) = N(1)/C(1)/C(2)/C(3)/C(4)/C(5); R(2)= N(2)/C(7)/C(8)/C(9)/C(10)/C(11); R(3) = N(3)/C(13)/C(14)/C(15)/C(16)/C(17)

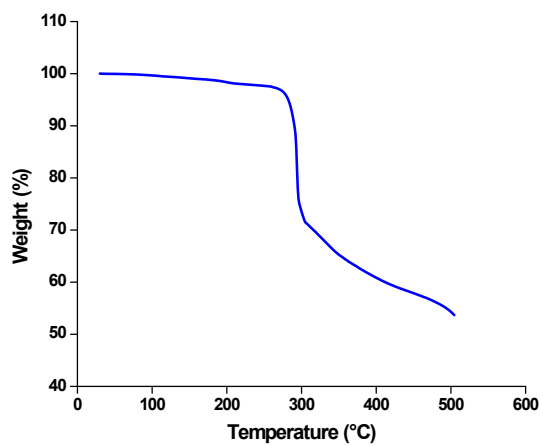

**Fig. S2** TGA plot of compound **1** measured under N<sub>2</sub> atmosphere.

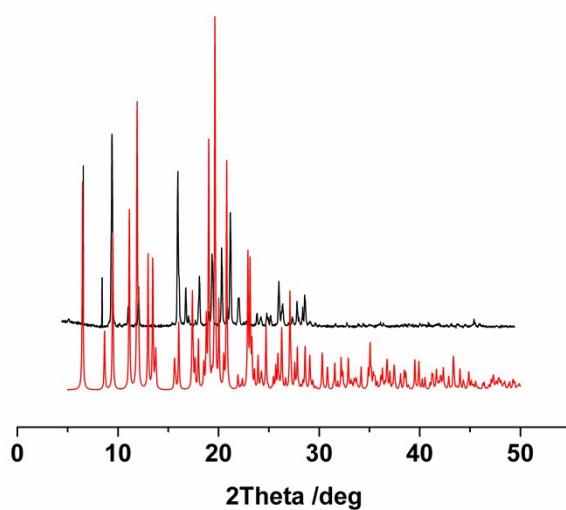

**Fig. S3** Powder X-ray diffraction patterns of simulated **1** (red) and as-synthesized **1** (black).

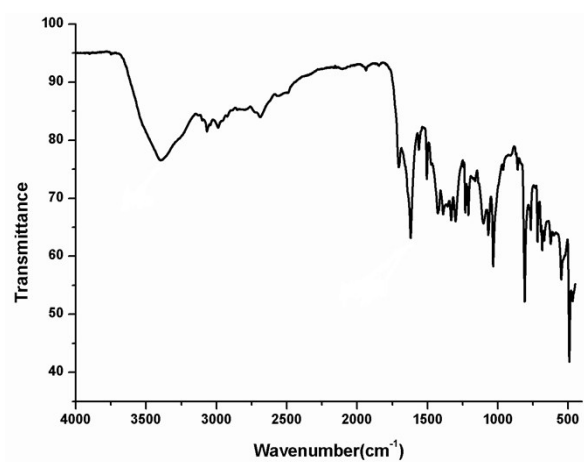

**Fig. S4** FT-IR spectrum of compound **1**.

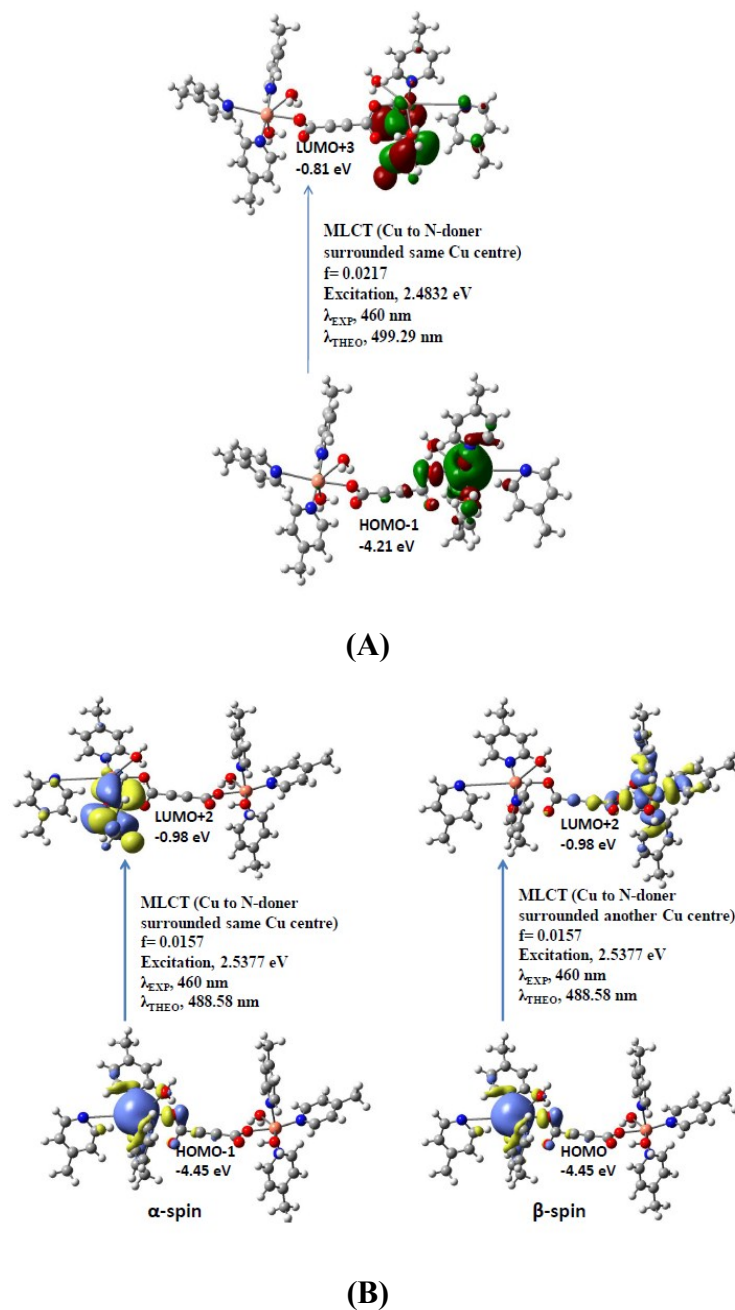

**Fig. S5** Frontier molecular orbitals for (A) ground state singlet configuration and (B) ground state triplet configuration involved in theoretical electronic transition correlated with experimental values of compound **1**.
